# Supplementary material for: Evidence for Direct Control of Virulence and Defense Gene Circuits by the Pseudomonas aeruginosa Quorum Sensing Regulator, MvfR
Source: PubMed Central journal article supplement (PMC5039717; doi:10.1038/srep34083), 2016-09-28
Supplement: srep34083-s1.pdf [file srep34083-s1.pdf]

**Evidence for Direct Control of Virulence and Defense Gene Circuits by the  
*Pseudomonas aeruginosa* Quorum Sensing Regulator, MvFR**

Damien Maura<sup>a,b,c</sup>, Ronen Hazan<sup>a,b,c,d</sup>, Tomoe Kitao<sup>a,b,c</sup>, Alicia E. Ballok<sup>a,b,c</sup> and Laurence G.  
Rahme<sup>a,b,c</sup>\*

<sup>a</sup>Department of Surgery, <sup>b</sup>Department of Microbiology and Immunobiology, Harvard Medical School and Massachusetts General Hospital, <sup>c</sup>Shriners Hospitals for Children Boston, Boston, 02114, Massachusetts, USA; <sup>d</sup>Institute of Dental Sciences and School of Dental Medicine, Hebrew University, Jerusalem P.O.B 12272, Israel 91120

**a**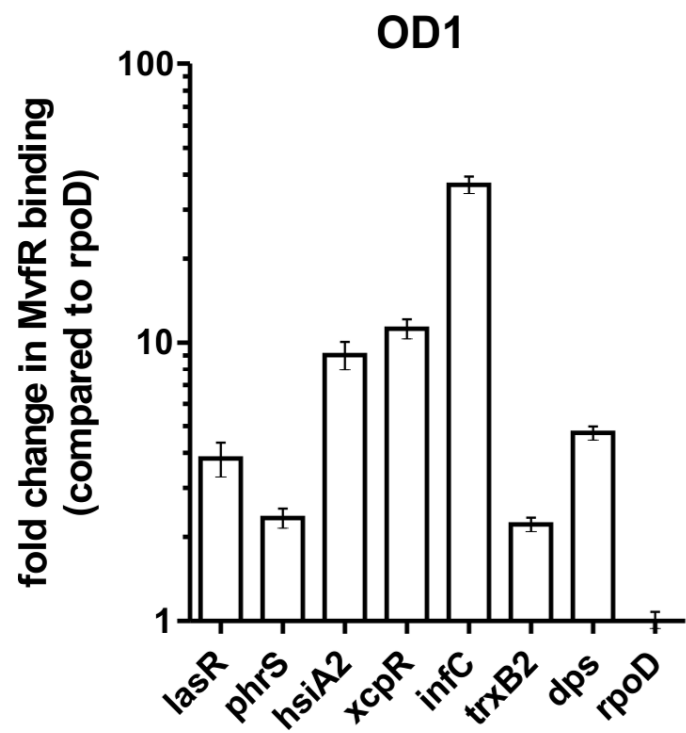**b**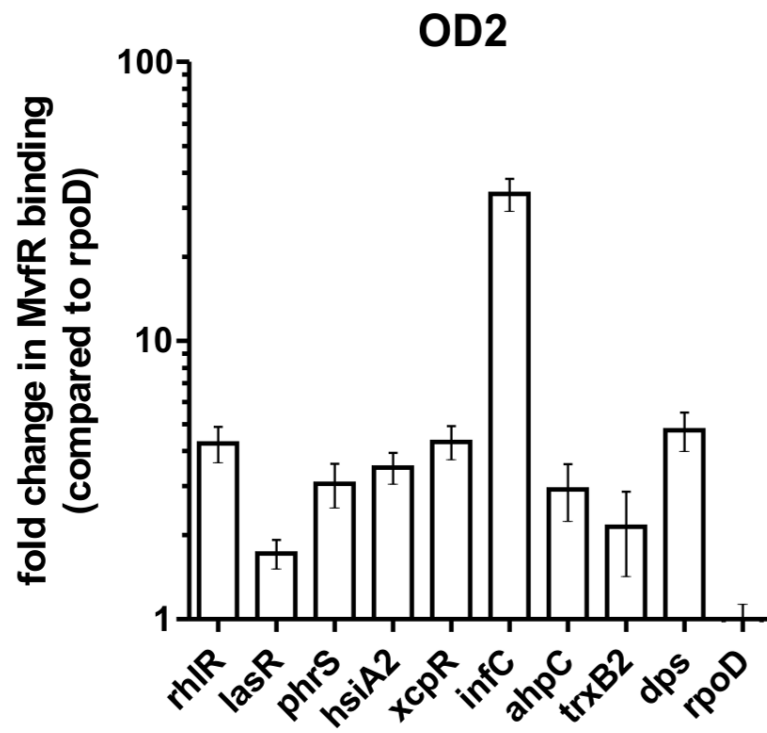**c**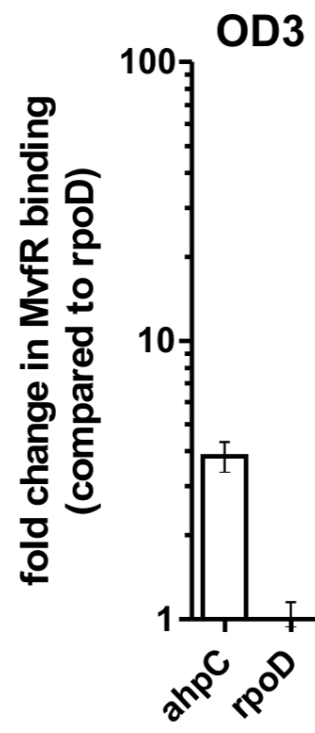

**Supplementary Figure S1: Validation by ChIPqPCR of the MvfR binding sites found in the ChIPseq**

ChIPqPCR analysis validates that MvfR is binding to *rhIR*, *lasR*, *phrS*, *hsiA2*, *xcpR*, *infC*, *ahpC*, *trxB2* and *dps* compared to the negative control *rpoD*. Data show the average +/- SEM of 3 independent replicates.

| MvfR binding site # | function                  | PA14#      | gene name       | regulation            | % expression versus WT |           | p value   |           |
|---------------------|---------------------------|------------|-----------------|-----------------------|------------------------|-----------|-----------|-----------|
|                     |                           |            |                 |                       | mvfR- OD2              | mvfR- OD3 | mvfR- OD2 | mvfR- OD3 |
| 1                   | antioxidant               | PA14_01710 | <i>ahpC</i>     | positive              | 45.6%                  | 74.0%     | 0.0163    | 0.3613    |
|                     |                           | PA14_01720 | <i>ahpF</i>     |                       | 46.3%                  | 39.5%     | 0.0184    | 0.0046    |
| 2                   | rRNA #1                   | PA14_08570 | <i>16S rRNA</i> | negative (see RTqPCR) | na.                    | na.       | na.       | na.       |
|                     |                           | PA14_08580 | <i>tRNA-Ile</i> |                       | na.                    | na.       | na.       | na.       |
|                     |                           | PA14_08590 | <i>tRNA-Ala</i> |                       | na.                    | na.       | na.       | na.       |
|                     |                           | PA14_08600 | <i>23S rRNA</i> |                       | na.                    | na.       | na.       | na.       |
|                     |                           | PA14_08610 | <i>5S rRNA</i>  |                       | na.                    | na.       | na.       | na.       |
| 3                   | pyochelin                 | PA14_09270 | <i>pchE</i>     | positive              | 1.3%                   | 2.0%      | 8.17E-27  | 2.10E-23  |
|                     |                           | PA14_09280 | <i>pchF</i>     |                       | 1.1%                   | 2.1%      | 4.08E-28  | 3.28E-23  |
|                     |                           | PA14_09290 | <i>pchG</i>     |                       | 1.2%                   | 2.0%      | 3.45E-26  | 1.10E-22  |
|                     |                           | PA14_09300 | <i>pchI</i>     |                       | 1.3%                   | 1.2%      | 4.57E-26  | 1.56E-26  |
|                     |                           | PA14_09320 | <i>pchJ</i>     |                       | 0.9%                   | 0.9%      | 1.02E-28  | 1.66E-28  |
| 4                   | ABC transporter           | PA14_13580 | nd.             | positive              | 55.7%                  | 103.4%    | 0.0744    | 0.8998    |
|                     |                           | PA14_13590 | nd.             |                       | 64.4%                  | 124.1%    | 0.1921    | 0.4928    |
|                     |                           | PA14_13600 | nd.             |                       | 74.1%                  | 131.6%    | 0.3724    | 0.3831    |
|                     | PA14_13610                | nd.        | 135.3%          | 192.0%                | 0.3674                 | 0.0471    |           |           |
|                     | cation transporter        | PA14_13620 | <i>nhaP</i>     | negative              | 212.8%                 | 93.7%     | 0.0264    | 0.8753    |
| 5                   | RhIR QS system            | PA14_19100 | <i>rhIA</i>     | positive              | 42.9%                  | 79.5%     | 0.0098    | 0.4894    |
|                     |                           | PA14_19110 | <i>rhIB</i>     |                       | 36.1%                  | 77.7%     | 0.0019    | 0.4445    |
|                     |                           | PA14_19120 | <i>rhIR</i>     |                       | 52.8%                  | 81.5%     | 0.0504    | 0.5384    |
|                     |                           | PA14_19130 | <i>rhII</i>     |                       | 84.5%                  | 90.6%     | 0.6154    | 0.7775    |
| 6                   | small RNA                 | PA14_21260 | <i>phrS</i>     | positive              | 49.7%                  | 94.1%     | 0.0360    | 0.8752    |
| 7                   | unknown                   | PA14_21530 | nd.             | positive              | 24.3%                  | 17.3%     | 4.43E-05  | 3.22E-07  |
| 8                   | unknown                   | PA14_22090 | nd.             | negative              | 211.6%                 | 75.3%     | 0.0709    | 0.4699    |
| 9                   | unknown                   | PA14_22320 | nd.             | positive              | 12.6%                  | 2.3%      | 5.13E-04  | 6.15E-19  |
| 10                  | T2SS                      | PA14_23970 | <i>xcpQ</i>     | positive              | 80.9%                  | 99.6%     | 0.5210    | 0.9923    |
|                     |                           | PA14_23980 | <i>xcpP</i>     |                       | 81.6%                  | 86.3%     | 0.5491    | 0.6684    |
|                     |                           | PA14_23990 | <i>xcpR</i>     |                       | 75.6%                  | 110.9%    | 0.3943    | 0.7293    |
|                     |                           | PA14_24010 | <i>xcpS</i>     |                       | 76.3%                  | 104.6%    | 0.4136    | 0.8727    |
|                     |                           | PA14_24020 | <i>xcpT</i>     |                       | 59.3%                  | 124.3%    | 0.1119    | 0.4886    |
|                     |                           | PA14_24040 | <i>xcpU</i>     |                       | 63.2%                  | 132.7%    | 0.1649    | 0.3724    |
|                     |                           | PA14_24050 | <i>xcpV</i>     |                       | 58.7%                  | 158.7%    | 0.1151    | 0.1622    |
|                     |                           | PA14_24060 | <i>xcpW</i>     |                       | 75.6%                  | 121.8%    | 0.4067    | 0.5299    |
|                     |                           | PA14_24070 | <i>xcpX</i>     |                       | 82.4%                  | 101.7%    | 0.5730    | 0.9412    |
|                     |                           | PA14_24080 | <i>xcpY</i>     |                       | 66.3%                  | 102.9%    | 0.2119    | 0.9138    |
| PA14_24100          | <i>xcpZ</i>               | 60.5%      | 110.0%          | 0.1304                | 0.7542                 |           |           |           |
| 11                  | SOS response              | PA14_25160 | <i>lexA</i>     | negative              | 176.0%                 | 139.4%    | 0.0858    | 0.3027    |
|                     | sigma factor              | PA14_25180 | <i>prsA</i>     | positive              | 56.8%                  | 84.0%     | 0.0828    | 0.6044    |
| 12                  | translation               | PA14_28650 | <i>thrS</i>     | negative (see RTqPCR) | na.                    | na.       | na.       | na.       |
|                     |                           | PA14_28660 | <i>infC</i>     |                       | na.                    | na.       | na.       | na.       |
|                     |                           | PA14_28670 | <i>rpmL</i>     |                       | na.                    | na.       | na.       | na.       |
|                     |                           | PA14_28680 | <i>rplT</i>     |                       | na.                    | na.       | na.       | na.       |
| 13                  | putative iron transporter | PA14_28970 | nd.             | positive              | 66.2%                  | 15.8%     | 0.5864    | 1.82E-05  |
|                     |                           | PA14_28980 | nd.             |                       | 188.0%                 | 22.3%     | 0.2344    | 1.03E-04  |
| 14                  | pyoverdine                | PA14_33610 | nd.             | positive              | 91.4%                  | 29.6%     | 0.7916    | 2.22E-04  |
| 15                  | cupA fimbriae             | PA14_37000 | <i>cupA5</i>    | negative              | 234.0%                 | 283.0%    | 0.5970    | 0.2487    |
|                     |                           | PA14_37010 | <i>cupA4</i>    |                       | 497.8%                 | 253.6%    | 0.0190    | 0.0647    |
|                     |                           | PA14_37030 | <i>cupA3</i>    |                       | 131.7%                 | 167.2%    | 0.6505    | 0.2187    |
|                     |                           | PA14_37040 | <i>cupA2</i>    |                       | 327.9%                 | 1534.3%   | 0.1186    | 3.01E-05  |
|                     |                           | PA14_37060 | <i>cupA1</i>    |                       | 150.4%                 | 209.7%    | 0.2327    | 0.0303    |
|                     |                           | PA14_37070 | <i>crgA</i>     |                       | 77.7%                  | 330.8%    | 0.4439    | 3.51E-04  |
| PA14_37080          | <i>crgC</i>               | 103.4%     | 188.5%          | 0.9086                | 0.0705                 |           |           |           |
| 16                  | unknown                   | PA14_39480 | nd.             | positive              | 39.0%                  | 79.7%     | 0.0041    | 0.4959    |
| 17                  | iron transporter          | PA14_39800 | <i>femI</i>     | positive              | 22.6%                  | 9.8%      | 0.0011    | 2.42E-09  |
|                     |                           | PA14_39810 | <i>femR</i>     |                       | 87.9%                  | 21.0%     | 0.7775    | 7.88E-06  |
|                     |                           | PA14_39820 | <i>femA</i>     |                       | 188.2%                 | 53.0%     | 0.1775    | 0.1060    |
| 18                  | T6SS locus 2              | PA14_42970 | <i>sfa2</i>     | positive              | 53.3%                  | 109.1%    | 0.0574    | 0.8044    |
|                     |                           | PA14_42980 | <i>clpV2</i>    |                       | 60.1%                  | 95.8%     | 0.1190    | 0.9195    |
|                     |                           | PA14_42990 | <i>hsiH2</i>    |                       | 62.1%                  | 75.0%     | 0.1567    | 0.4326    |
|                     |                           | PA14_43000 | <i>hsiG2</i>    |                       | 50.2%                  | 92.0%     | 0.0364    | 0.8386    |
|                     |                           | PA14_43020 | <i>hsiF2</i>    |                       | 46.4%                  | 85.3%     | 0.0221    | 0.7078    |
|                     |                           | PA14_43030 | <i>hsiC2</i>    |                       | 45.8%                  | 99.1%     | 0.0170    | 1.0000    |
|                     |                           | PA14_43040 | <i>hsiB2</i>    |                       | 50.3%                  | 104.6%    | 0.0372    | 0.8917    |
|                     |                           | PA14_43050 | <i>hsiA2</i>    |                       | 53.6%                  | 53.7%     | 0.0557    | 0.0590    |
|                     |                           | PA14_43070 | <i>hcp2</i>     |                       | 83.8%                  | 106.3%    | 0.6700    | 0.9442    |
|                     |                           | PA14_43080 | <i>vgrG2</i>    |                       | 98.7%                  | 82.2%     | 0.2025    | 1.0000    |
| PA14_43090          | nd.                       | 54.3%      | 62.1%           | 0.2342                | 0.4469                 |           |           |           |
| PA14_43100          | nd.                       | 90.1%      | 122.0%          | 0.7749                | 0.5318                 |           |           |           |
| 19                  | putative urea transporter | PA14_45060 | nd.             | negative              | 1323.4%                | 97.3%     | 0.0022    | 1.0000    |
| 20                  | LasR QS system            | PA14_45940 | <i>lasI</i>     | positive              | 65.1%                  | 81.2%     | 0.1884    | 0.5331    |
|                     |                           | PA14_45950 | <i>rsaL</i>     |                       | 57.4%                  | 84.8%     | 0.0926    | 0.6313    |
|                     |                           | PA14_45960 | <i>lasR</i>     |                       | 65.8%                  | 82.7%     | 0.2000    | 0.5695    |
| 21                  | unknown                   | PA14_46160 | nd.             | positive              | 49.8%                  | 84.7%     | 0.0348    | 0.6285    |
| 22                  | putative iron transporter | PA14_46810 | nd.             | positive              | 62.0%                  | 85.4%     | 0.1586    | 0.6440    |
|                     |                           | PA14_46820 | nd.             |                       | 65.9%                  | 89.7%     | 0.2212    | 0.7592    |
| 23                  | cobalamine biosynthesis   | PA14_47650 | <i>cobS</i>     | unclear               | 113.0%                 | 102.6%    | 0.7207    | 0.9564    |
|                     |                           | PA14_47660 | nd.             |                       | 107.6%                 | 119.6%    | 0.8194    | 0.5889    |
|                     |                           | PA14_47670 | <i>cobT</i>     |                       | 97.4%                  | 101.4%    | 0.9543    | 0.9522    |
|                     |                           | PA14_47680 | <i>cobU</i>     |                       | 122.6%                 | 95.7%     | 0.5426    | 0.9350    |
|                     |                           | PA14_47690 | <i>cobQ</i>     |                       | 124.8%                 | 96.1%     | 0.4896    | 0.9324    |
|                     |                           | PA14_47720 | <i>cobC</i>     |                       | 120.7%                 | 97.5%     | 0.5619    | 0.9771    |
|                     |                           | PA14_47730 | <i>cobD</i>     |                       | 146.4%                 | 104.9%    | 0.2585    | 0.8937    |
|                     |                           | PA14_47750 | nd.             |                       | 139.4%                 | 125.4%    | 0.3259    | 0.5076    |
|                     |                           | PA14_47760 | <i>cobB</i>     |                       | 128.4%                 | 100.3%    | 0.4330    | 0.9789    |
|                     |                           | PA14_47790 | <i>cobO</i>     |                       | 137.8%                 | 84.3%     | 0.3199    | 0.6177    |
| PA14_47800          | nd.                       | 167.2%     | 79.0%           | 0.1103                | 0.4845                 |           |           |           |
|                     |                           | PA14_47910 | nd.             |                       | 281.2%                 | 149.0%    | 0.0430    | 0.3588    |
|                     |                           | PA14_47920 | nd.             |                       | 71.5%                  | 77.5%     | 0.7259    | 0.8343    |

|            |                                     |            |                 |                                       |        |        |          |          |
|------------|-------------------------------------|------------|-----------------|---------------------------------------|--------|--------|----------|----------|
| 24         | ABC transporter arabinose transport | PA14_47930 | nd.             | negative                              | 275.5% | 101.3% | 0.1063   | 1.0000   |
|            |                                     | PA14_47940 | nd.             |                                       | 93.8%  | 158.9% | 1.0000   | 0.6625   |
|            |                                     | PA14_47950 | nd.             |                                       | 20.4%  | 111.6% | 0.1569   | 1.0000   |
|            |                                     | PA14_47960 | nd.             |                                       | 103.1% | 115.9% | 1.0000   | 0.7770   |
|            |                                     | PA14_47970 | nd.             |                                       | 67.4%  | 86.0%  | 0.3713   | 0.7021   |
| 25         | putative antibiotic efflux pump     | PA14_48240 | nd.             | unclear                               | 111.7% | 54.7%  | 0.9045   | 0.1344   |
|            |                                     | PA14_48280 | nd.             |                                       | 104.6% | 99.0%  | 1.0000   | 1.0000   |
|            |                                     | PA14_48300 | nd.             |                                       | 305.1% | 67.6%  | 0.0538   | 0.3947   |
| 26         | rhamnolipids biosynthesis           | PA14_49750 | nd.             | positive                              | 63.0%  | 75.3%  | 0.1847   | 0.4027   |
|            |                                     | PA14_49760 | <i>rhlC</i>     |                                       | 42.9%  | 74.5%  | 0.0110   | 0.3732   |
| 27         | MvfR QS system                      | PA14_51340 | <i>mvfR</i>     | positive                              | 66.4%  | 55.5%  | 0.2132   | 0.0725   |
| 28         | MvfR QS system                      | PA14_51350 | <i>phnB</i>     | positive                              | 3.9%   | 12.4%  | 1.56E-17 | 2.68E-09 |
|            |                                     | PA14_51360 | <i>phnA</i>     |                                       | 2.0%   | 4.5%   | 6.44E-23 | 1.00E-16 |
| 29         | MvfR QS system                      | PA14_51380 | <i>pqsE</i>     | positive                              | 1.8%   | 4.7%   | 9.56E-24 | 2.35E-16 |
|            |                                     | PA14_51390 | <i>pqsD</i>     |                                       | 2.2%   | 4.0%   | 3.91E-22 | 1.32E-17 |
|            |                                     | PA14_51410 | <i>pqsC</i>     |                                       | 1.0%   | 1.7%   | 3.29E-28 | 7.19E-24 |
|            |                                     | PA14_51420 | <i>pqsB</i>     |                                       | 1.2%   | 2.2%   | 4.33E-26 | 1.20E-21 |
|            |                                     | PA14_51430 | <i>pqsA</i>     |                                       | 0.7%   | 1.3%   | 3.46E-30 | 1.71E-25 |
| 30         | antioxidant                         | PA14_51830 | <i>dps</i>      | positive                              | 49.6%  | 74.3%  | 0.0316   | 0.3672   |
| 31         | phenylalanine catabolism            | PA14_52980 | nd.             | positive                              | 93.0%  | 103.1% | 0.8432   | 0.9080   |
|            |                                     | PA14_52990 | nd.             |                                       | 50.7%  | 86.3%  | 0.0372   | 0.6624   |
|            |                                     | PA14_53000 | nd.             |                                       | 53.8%  | 91.6%  | 0.0588   | 0.8051   |
|            |                                     | PA14_53010 | nd.             |                                       | 57.0%  | 90.0%  | 0.0843   | 0.7592   |
| 32         | antioxidant                         | PA14_53290 | <i>trxB2</i>    | positive                              | 34.8%  | 21.4%  | 0.0015   | 4.68E-06 |
|            |                                     | PA14_53300 | <i>ahpB</i>     |                                       | 17.3%  | 10.3%  | 5.68E-07 | 1.37E-10 |
| 33         | rRNA #2                             | PA14_55620 | <i>5S rRNA</i>  | negative (see RTqPCR)                 | na.    | na.    | na.      | na.      |
|            |                                     | PA14_55631 | <i>23S rRNA</i> |                                       | na.    | na.    | na.      | na.      |
|            |                                     | PA14_55634 | <i>tRNA-Ala</i> |                                       | na.    | na.    | na.      | na.      |
|            |                                     | PA14_55635 | <i>tRNA-Ile</i> |                                       | na.    | na.    | na.      | na.      |
|            |                                     | PA14_55637 | <i>16S rRNA</i> |                                       | na.    | na.    | na.      | na.      |
| 34         | ABC transporter (arginine?)         | PA14_58350 | <i>dppA1</i>    | positive (indirect via blocking PsdR) | 77.0%  | 96.1%  | 0.4285   | 0.9206   |
|            |                                     | PA14_58360 | <i>dppA2</i>    |                                       | 72.3%  | 103.2% | 0.3290   | 0.9046   |
|            |                                     | PA14_58375 | <i>mdpA</i>     |                                       | 70.1%  | 63.1%  | 0.2777   | 0.1693   |
|            |                                     | PA14_58380 | <i>psdR</i>     | negative                              | 149.9% | 115.3% | 0.2382   | 0.7108   |
|            |                                     | PA14_58390 | <i>dppA3</i>    | positive (indirect via blocking PsdR) | 65.6%  | 62.8%  | 0.1949   | 0.1564   |
|            |                                     | PA14_58410 | <i>odp</i>      |                                       | 91.6%  | 77.8%  | 0.8012   | 0.4629   |
|            |                                     | PA14_58420 | <i>dppA4</i>    |                                       | 76.7%  | 109.7% | 0.4191   | 0.7617   |
|            |                                     | PA14_58440 | <i>dppB</i>     |                                       | 76.2%  | 122.0% | 0.4088   | 0.5290   |
|            |                                     | PA14_58450 | <i>dppC</i>     |                                       | 78.9%  | 113.2% | 0.4735   | 0.6960   |
|            |                                     | PA14_58470 | <i>dppD</i>     |                                       | 80.1%  | 119.0% | 0.5038   | 0.5816   |
| PA14_58490 | <i>dppF</i>                         | 77.8%      | 113.1%          |                                       | 0.4476 | 0.6905 |          |          |
| 35         | rRNA #3                             | PA14_62050 | <i>5S rRNA</i>  | negative (see RTqPCR)                 | na.    | na.    | na.      | na.      |
|            |                                     | PA14_62060 | <i>23S rRNA</i> |                                       | na.    | na.    | na.      | na.      |
|            |                                     | PA14_62070 | <i>tRNA-Ala</i> |                                       | na.    | na.    | na.      | na.      |
|            |                                     | PA14_62080 | <i>tRNA-Ile</i> |                                       | na.    | na.    | na.      | na.      |
|            |                                     | PA14_62090 | <i>16S rRNA</i> |                                       | na.    | na.    | na.      | na.      |
| 36         | D-alanine metabolism                | PA14_70010 | nd.             | positive                              | 53.9%  | 105.9% | 0.0610   | 0.8469   |
|            |                                     | PA14_70040 | <i>dadA</i>     |                                       | 66.1%  | 116.9% | 0.2056   | 0.6104   |
| 37         | rRNA #4                             | PA14_70870 | <i>5S rRNA</i>  | negative (see RTqPCR)                 | na.    | na.    | na.      | na.      |
|            |                                     | PA14_70880 | <i>23S rRNA</i> |                                       | na.    | na.    | na.      | na.      |
|            |                                     | PA14_70890 | <i>tRNA-Ala</i> |                                       | na.    | na.    | na.      | na.      |
|            |                                     | PA14_70900 | <i>tRNA-Ile</i> |                                       | na.    | na.    | na.      | na.      |
|            |                                     | PA14_70910 | <i>16S rRNA</i> |                                       | na.    | na.    | na.      | na.      |

**Supplementary Table S1: RNAseq data showing expression of genes of interest in each of the 37 MvfR binding site.**

|              | primer name  | sequence 5' - 3'       |
|--------------|--------------|------------------------|
| for ChIPqPCR | rhIR_ChIP-F  | CCCTCATGTGTGTGCTGGTA   |
|              | rhIR_ChIP-R  | CGATGAAGACTTGATGCCGG   |
|              | lasR_ChIP-F  | AGTGCGTAGTCCTTGAGCAT   |
|              | lasR_ChIP-R  | CGTACTGCCGATTTTCTGGG   |
|              | phrS_ChIP-F  | CTCATGGTCGCTTTCTTCGG   |
|              | phrS_ChIP-R  | AGGCGATATGTGCAGCCTAT   |
|              | hsiA2_ChIP-F | TTGCCAGCTCATTTCAG      |
|              | hsiA2_ChIP-R | CATGGTGTGCATTGAAGGGT   |
|              | xcpR_ChIP-F  | GCTTAAGATAACGGCTCGCC   |
|              | xcpR_ChIP-R  | AATGGGGCTGTCATCATGGA   |
|              | ahpC_ChIP-F  | ACTACGGCGAGTTCAGAAA    |
|              | ahpC_ChIP-R  | GTTGATCACGAAGGTACCGC   |
|              | trxB2_ChIP-F | CCAGGCTCCCGGAAGAATAT   |
|              | trxB2_ChIP-R | TCCGACAAGAGCCAGATACC   |
|              | dps_ChIP-F   | AAGGCCGACTGAAAGGAGAA   |
|              | dps_ChIP-R   | TGCAGCGTATTGAACATCGG   |
|              | infC_ChIP-F  | ATTCCGTGCCAAGTCCGA     |
|              | infC_ChIP-R  | GGCCTTCGATTCAACTTCCC   |
|              | rpoD_ChIP-F  | ACCGTCGTGGCTACAAATTC   |
|              | rpoD_ChIP-R  | GGCGATCTTCAGTACCTTGC   |
| for qRT-PCR  | rhIR-F1      | CTCCTCGGAAATGGTGGTCT   |
|              | rhIR-R1      | TTCTGGGTCAGCAACTCGAT   |
|              | lasR-F1      | CGTACTGCCGATTTTCTGGG   |
|              | lasR-R1      | AGTGCGTAGTCCTTGAGCAT   |
|              | phrS-F1      | TGTTTCATCGACGAAGTGGTT  |
|              | phrS-R1      | GGCTATGGGAATCCTTCCAG   |
|              | hsiA2-F1     | GTGTTGAAGCAGGGCATGAA   |
|              | hsiA2-R1     | AATCCCGATTTCGTGCAACTG  |
|              | hcp2-F       | GGCTTCAACCACGAAGTGAT   |
|              | hcp2-R       | AGGTGATCTTGCGGTAGGTG   |
|              | xcpP-F1      | CGGACGACATTACAAGCGAG   |
|              | xcpP-R1      | TCGCTCGAGTCTTCTTCGG    |
|              | xcpR-F1      | CAAGCTGATGGACGAAACGG   |
|              | xcpR-R1      | CCAGGTGGTATTCGATCGGA   |
|              | xcpS-F1      | GACAGTTCCCGCCGATGAT    |
|              | xcpS-R1      | GAATGGCAAGGACGATGACC   |
|              | 16S-F1       | GGGAGGAAGGGCAGTAAGTT   |
|              | 16S-R1       | ACCACCCTCTACCGTACTCT   |
|              | 23S-F1       | GGTACTCCGGGGATAACAGG   |
|              | 23S-R1       | CTCTCGTACTAGGAGCAGCC   |
|              | 5S-F1        | GAACCACCTGATCCCTTCCC   |
|              | 5S-R1        | TAGGAGCTTGACGATGACCT   |
|              | thrS-F1      | CGTGCAGATCTTCAACCAGG   |
|              | thrS-R1      | TTCTTACCTGCTCTTCGGT    |
|              | infC-F       | CATCTCGGCTCGTGAGGTAC   |
|              | infC-R       | GTAGTCCATGATGCGGCAGA   |
|              | rpml-F1      | TGCCAAAGATGAAGACCAAAGT |
|              | rpml-R1      | CGCAACGTCAGACTTGTTCA   |

|          |                       |
|----------|-----------------------|
| ahpC-F1  | ACTACGGCGAGTTCCAGAAA  |
| ahpC-R1  | GTTGATCACGAAGGTACCGC  |
| ahpF-F1  | GGTCGACATCATGAACCTGC  |
| ahpF-R1  | CCTTGGCCTTGTATTCCCTGC |
| ahpB-F1  | GATGCCTTCCAGCTTTCCAG  |
| ahpB-R1  | GAAGTCCGAGTCGATGGAGA  |
| trxB2-F1 | TCGGCCATACTCCCAATACC  |
| trxB2-R1 | AATCGAGATAGCGCTCCACA  |
| dps-F1   | CCGATGTTCAATACGCTGCA  |
| dps-R1   | ACGCCTTCCTCTTCCTTGAT  |
| rpoD-F   | CTGATCCAGGAAGGCAACAT  |
| rpoD-R   | TGAGCTTGTTGATCGTCTCG  |



**Supplementary Table S2: List of primers used for ChIPqPCR or qRT-PCR.**
